# Supplementary material for: C89 Induces Autophagy of Female Germline Stem Cells via Inhibition of the PI3K-Akt Pathway In Vitro
Source: MDPI journal article supplement (doi:10.3390/cells8060606), 2019-06-18
Supplement: s1 [file s1]

Supplementary Matrials

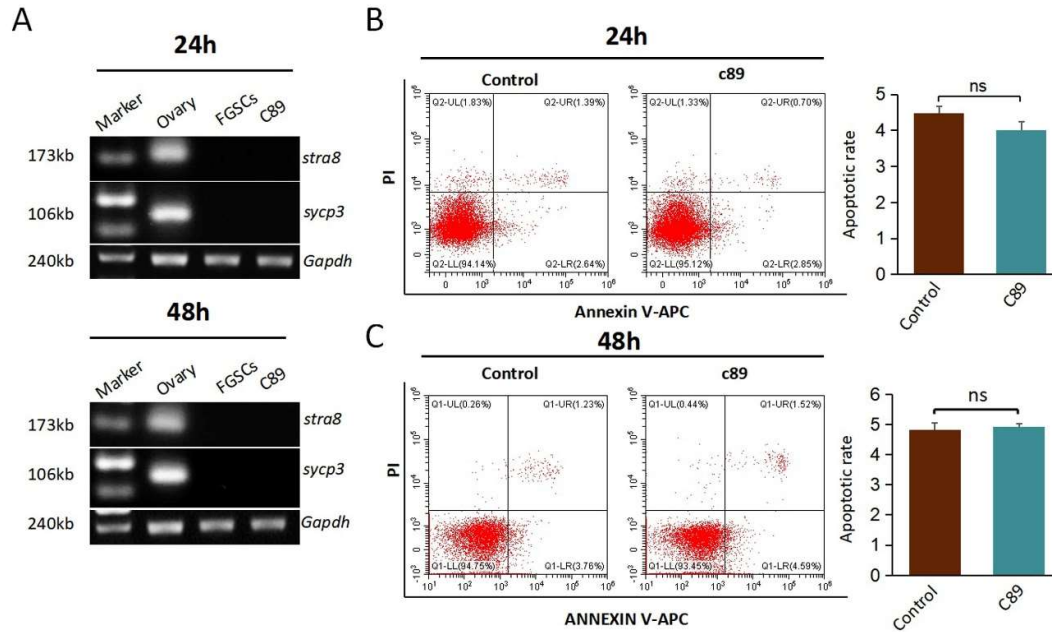

**Figure 1.** C89 had no effect on differentiation and apoptosis of FGSCs at 24 h or 48 h in vitro. (A) The expression of differentiation markers of FGSCs was detected by RT-PCR at 24 h and 48 h. No expressions of *Sycp3* and *Stra8* were detected in FGSCs and C89-treated FGSCs. Ovary served as the positive control. (B–) FGSC apoptosis was detected by flow cytometry. The apoptotic rate showed no significant difference between C89-treated groups and control groups at 24 h (B) or 48 h (C). ns: not significant.

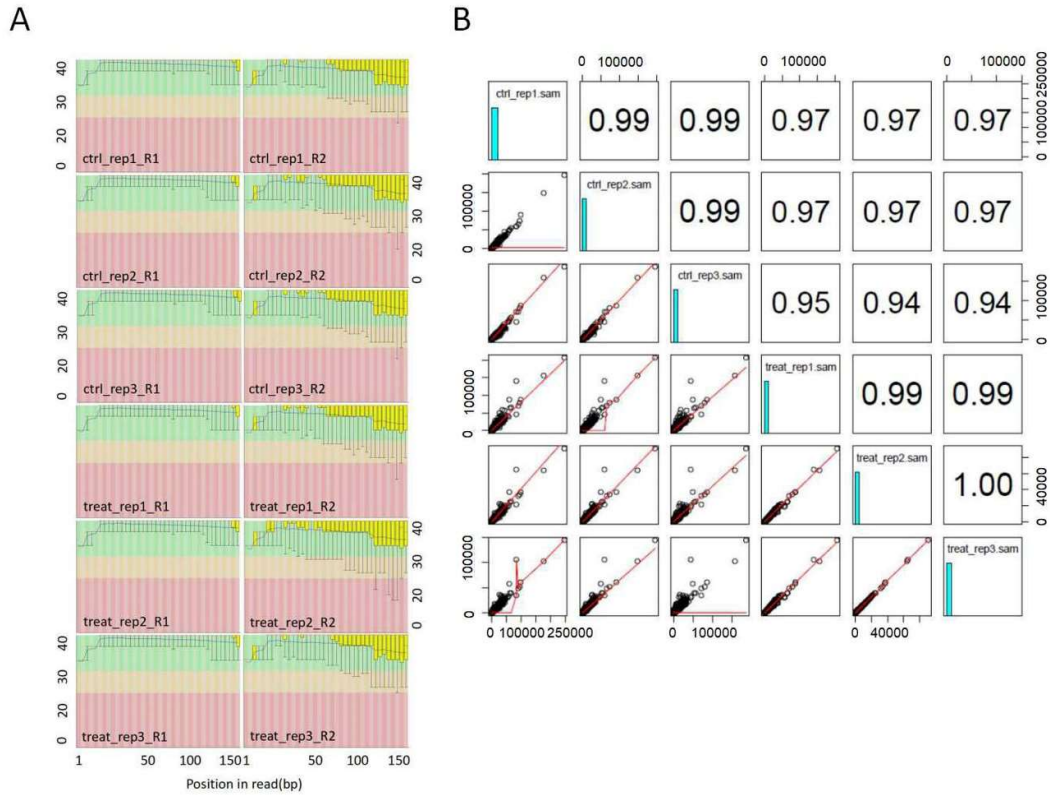

**Figure 2.** RNA-Seq quality control. **(A)** The Fast-QC data showing the position-specific sequencing quality in each replicated group. Data filtering criteria: Q-score higher than 10 (error rate < 10%). **(B)** The correlation plots of each replicated sample. The correlation coefficient of each replicated sample showed very good consistency. Ctrl: DMSO-treated group, treat: C89-treated group.

| Differentiation related genes |             |                |             | Apoptosis related genes |             |                |             |
|-------------------------------|-------------|----------------|-------------|-------------------------|-------------|----------------|-------------|
| Symbol                        | BaseMean    | Log2FoldChange | P-value     | Symbol                  | BaseMean    | Log2FoldChange | P-value     |
| <i>Stra8</i>                  | 0           | NA             | NA          | <i>Fasl</i>             | 0.398275911 | -0.046778161   | NA          |
| <i>Sycp3</i>                  | 0.821181976 | -0.138526804   | NA          | <i>Casp1</i>            | 0           | NA             | NA          |
| <i>Sycp2</i>                  | 0           | NA             | NA          | <i>Cox6b2</i>           | 2.327389915 | 0.251237924    | NA          |
| <i>Sycp1</i>                  | 44.15313238 | 0.209594478    | 0.626644766 | <i>Apaf1</i>            | 716.1501603 | -0.153586386   | 0.304142427 |
| <i>Syce1</i>                  | 0           | NA             | NA          | <i>Atm</i>              | 1217.959625 | -0.121556373   | 0.601505372 |
| <i>Dmc1</i>                   | 0.856228319 | 0.06892028     | NA          | <i>Casp8</i>            | 1215.923173 | 0.103682703    | 0.539648625 |

**Figure 3.** RNA-Seq results of some differentiation- and apoptosis-related genes. **(A)** The fragments per kilobase million (FRPK) of some differentiation-related genes. **(B)** The FRPK of some apoptosis related genes. NA, not available.

Table S1: the sequence of primes used for PCR

| <b>PCR</b>     | <b>Forward (5'-3')</b>    | <b>Reverse (5'-3')</b>         |
|----------------|---------------------------|--------------------------------|
| <i>Gapdh</i>   | GTCGTGGAGTCTACTGGTGTC     | GAGCCCTTCCACAATGCCAAA          |
| <i>Stra8</i>   | ACAACCTAAGGAAGGCAGTTTAC   | GACCTCCTCTAAGCTGTTGGG          |
| <i>Sycp3</i>   | AGCCAGTAACCAGAAAATTGAGC   | CCACTGCTGCAACACATTCATA         |
| <i>Bcl2</i>    | CATGCCGTCCGAGAAGACCT      | GATGAGCCGGACATCTTCCACT         |
| <i>Trp53</i>   | GGAATCTCACCCCATCCA        | CAGTAAGCCAAGATCACGCC           |
| <i>ATG7</i>    | GCCTATATGTA CTGCTTCATCCA  | CATTCAGGGGTGTGCCTCA            |
| <i>Rubicon</i> | AACCTCACCCACCATCTTCTTAGCG | CACAGAGTTAAGTGCATAATTGGCATAAAG |
